# Supplementary material for: CAR Macrophages for SARS-CoV-2 Immunotherapy
Source: PubMed Central journal article supplement (PMC8343226; doi:10.3389/fimmu.2021.669103), 2021-07-23
Supplement: DataSheet_1.pdf [file DataSheet_1.pdf]

**Supplementary Information for:**  
***CAR Macrophages for SARS-CoV-2 Immunotherapy***

| <b>Contents</b>                                                                           | <b>Page</b> |
|-------------------------------------------------------------------------------------------|-------------|
| Supplementary Figures.....                                                                | 2           |
| Figure S1. Biological effect of engineered macrophages is dependent on CAR receptor. .... | 2           |
| Figure S2. Characterization of CAR engineered primary human macrophages. ....             | 3           |

## Supplementary Figures

Figure S1

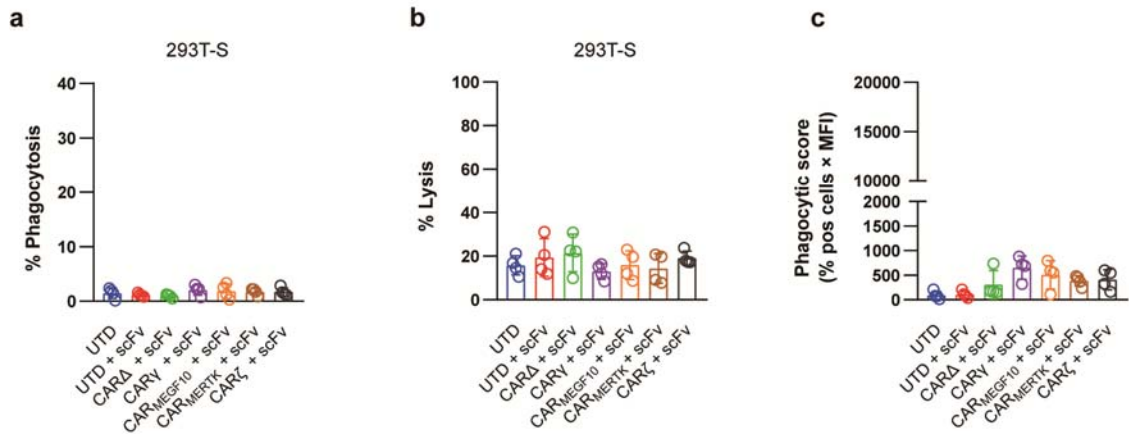

**Figure S1. Biological effect of engineered macrophages is dependent on CAR receptor.** **a.** FACS-based phagocytosis 293T-S target cells by UTD or different CAR macrophages with anti-S scFv. **b.** Killing of 293T-S cells by UTD or anti-S CAR macrophages with anti-S scFv 24 h assessed with a luciferase-based assay. **c.** The uptake of pseudotyped virions by UTD and CAR macrophages with scFv was analyzed by flow cytometry. The circles represent individual data.

**Figure S2**

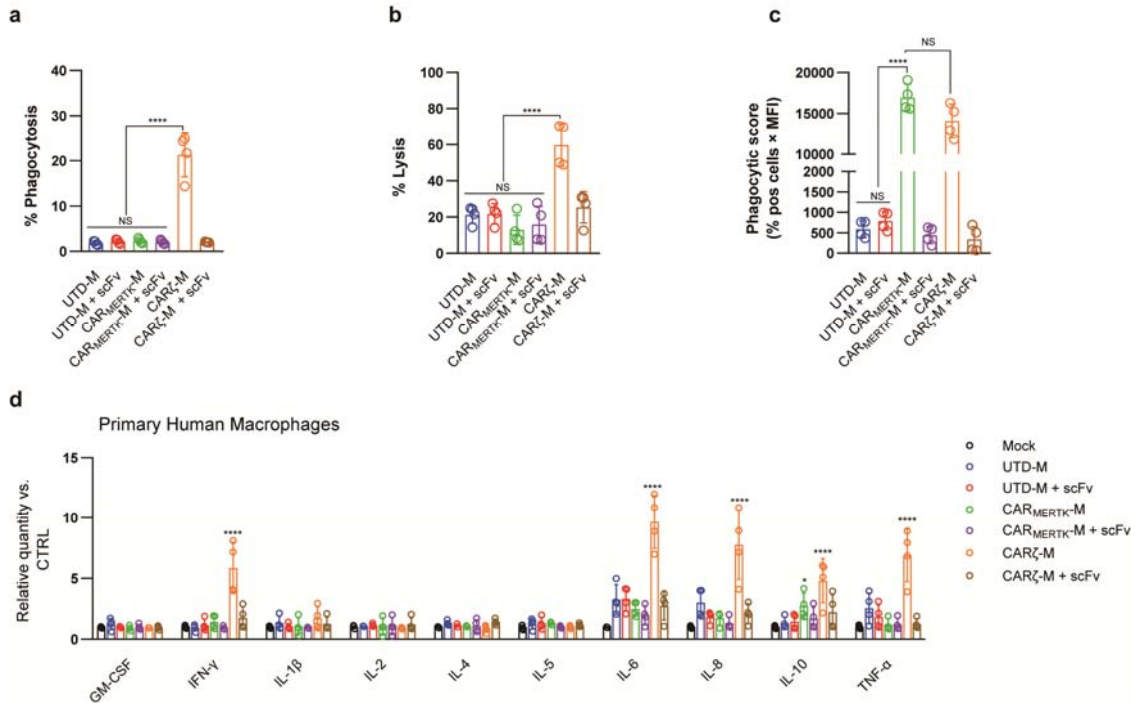

**Figure S2. Characterization of CAR engineered primary human macrophages. a.** FACS-based phagocytosis 293T-S target cells by different primary CAR macrophages with or without anti-S scFv. **b.** Killing of 293T-S cells by different primary CAR macrophages with or without anti-S scFv 24 h assessed with a luciferase-based assay. **c,** The uptake of pseudotyped virions by different primary CAR macrophages with or without scFv was analyzed by flow cytometry. **d,** different primary CAR macrophages were infected with the SARS-CoV-2 pseudotyped virus or mock infected. Cytokine levels in the supernatants were determined by a multiplex bead array. The relative level was calculated as the ratio of the infected cells to the mock-infected primary human macrophages. The circles represent individual data. P values were derived by one-way ANOVA followed by Tukey's posttest (a–c) or two-way ANOVA followed by the Bonferroni posttest (d); \* $p < 0.05$ , \*\* $p < 0.01$ , \*\*\* $p < 0.001$ , \*\*\*\* $p < 0.0001$ . The circles represent individual data.
